# Supplementary material for: Adverse muscle composition is a significant risk factor for all-cause mortality in NAFLD
Source: PubMed Central journal article supplement — JHEP Rep. 2022 Dec 24;5(3):100663. doi: 10.1016/j.jhepr.2022.100663 (PMC9929853; doi:10.1016/j.jhepr.2022.100663), 2022-12-24
Supplement: mmc3.pdf [file mmc3.pdf]

## ICMJE DISCLOSURE FORM

Date: 12-19-2022

Your Name: Arun Sanyal

Manuscript Title: JHEPR-D-22-00573

Manuscript number (if known): Adverse muscle composition is a significant risk factor for all-cause mortality in NAFLD

In the interest of transparency, we ask you to disclose all relationships/activities/interests listed below that are related to the content of your manuscript. "Related" means any relation with for-profit or not-for-profit third parties whose interests may be affected by the content of the manuscript. Disclosure represents a commitment to transparency and does not necessarily indicate a bias. If you are in doubt about whether to list a relationship/activity/interest, it is preferable that you do so.

The following questions apply to the author's relationships/activities/interests as they relate to the current manuscript only.

The author's relationships/activities/interests should be defined broadly. For example, if your manuscript pertains to the epidemiology of hypertension, you should declare all relationships with manufacturers of antihypertensive medication, even if that medication is not mentioned in the manuscript.

In item #1 below, report all support for the work reported in this manuscript without time limit. For all other items, the time frame for disclosure is the past 36 months.

|                                                           |                                                                                                                                                                                | Name all entities with whom you have this relationship or indicate none (add rows as needed) | Specifications/Comments (e.g., if payments were made to you or to your institution) |
|-----------------------------------------------------------|--------------------------------------------------------------------------------------------------------------------------------------------------------------------------------|----------------------------------------------------------------------------------------------|-------------------------------------------------------------------------------------|
| <b>Time frame: Since the initial planning of the work</b> |                                                                                                                                                                                |                                                                                              |                                                                                     |
| 1                                                         | All support for the present manuscript (e.g., funding, provision of study materials, medical writing, article processing charges, etc.)<br><b>No time limit for this item.</b> | ___ None                                                                                     |                                                                                     |
|                                                           |                                                                                                                                                                                |                                                                                              |                                                                                     |
|                                                           |                                                                                                                                                                                | <b>See Attached disclosures</b>                                                              |                                                                                     |
|                                                           |                                                                                                                                                                                |                                                                                              |                                                                                     |
|                                                           |                                                                                                                                                                                |                                                                                              |                                                                                     |
| <b>Time frame: past 36 months</b>                         |                                                                                                                                                                                |                                                                                              |                                                                                     |
| 2                                                         | Grants or contracts from any entity (if not indicated in item #1 above).                                                                                                       | ___ None                                                                                     |                                                                                     |
| 3                                                         | Royalties or licenses                                                                                                                                                          | ___ None                                                                                     |                                                                                     |
| 4                                                         | Consulting fees                                                                                                                                                                | ___ None                                                                                     |                                                                                     |

|    |                                                                                                              |          |  |
|----|--------------------------------------------------------------------------------------------------------------|----------|--|
| 5  | Payment or honoraria for lectures, presentations, speakers bureaus, manuscript writing or educational events | ___ None |  |
| 6  | Payment for expert testimony                                                                                 | ___ None |  |
| 7  | Support for attending meetings and/or travel                                                                 | ___ None |  |
| 8  | Patents planned, issued or pending                                                                           | ___ None |  |
| 9  | Participation on a Data Safety Monitoring Board or Advisory Board                                            | ___ None |  |
| 10 | Leadership or fiduciary role in other board, society, committee or advocacy group, paid or unpaid            | ___ None |  |
| 11 | Stock or stock options                                                                                       | ___ None |  |
| 12 | Receipt of equipment, materials, drugs, medical writing, gifts or other services                             | ___ None |  |
| 13 | Other financial or non-financial interests                                                                   | ___ None |  |

Please place an "X" next to the following statement to indicate your agreement:

X I certify that I have answered every question and have not altered the wording of any of the questions on this form.



## ICMJE DISCLOSURE FORM

Date: 2022-Dec-19

Your Name: Mattias Ekstedt

Manuscript Title: JHEPR-D-22-00573

Manuscript number (if known): Adverse muscle composition is a significant risk factor for all-cause mortality in NAFLD

In the interest of transparency, we ask you to disclose all relationships/activities/interests listed below that are related to the content of your manuscript. "Related" means any relation with for-profit or not-for-profit third parties whose interests may be affected by the content of the manuscript. Disclosure represents a commitment to transparency and does not necessarily indicate a bias. If you are in doubt about whether to list a relationship/activity/interest, it is preferable that you do so.

The following questions apply to the author's relationships/activities/interests as they relate to the current manuscript only.

The author's relationships/activities/interests should be defined broadly. For example, if your manuscript pertains to the epidemiology of hypertension, you should declare all relationships with manufacturers of antihypertensive medication, even if that medication is not mentioned in the manuscript.

In item #1 below, report all support for the work reported in this manuscript without time limit. For all other items, the time frame for disclosure is the past 36 months.

|                                                           |                                                                                                                                                                                | Name all entities with whom you have this relationship or indicate none (add rows as needed) | Specifications/Comments (e.g., if payments were made to you or to your institution) |
|-----------------------------------------------------------|--------------------------------------------------------------------------------------------------------------------------------------------------------------------------------|----------------------------------------------------------------------------------------------|-------------------------------------------------------------------------------------|
| <b>Time frame: Since the initial planning of the work</b> |                                                                                                                                                                                |                                                                                              |                                                                                     |
| 1                                                         | All support for the present manuscript (e.g., funding, provision of study materials, medical writing, article processing charges, etc.)<br><b>No time limit for this item.</b> | ___ None                                                                                     |                                                                                     |
|                                                           |                                                                                                                                                                                |                                                                                              |                                                                                     |
|                                                           |                                                                                                                                                                                |                                                                                              |                                                                                     |
|                                                           |                                                                                                                                                                                |                                                                                              |                                                                                     |
|                                                           |                                                                                                                                                                                |                                                                                              |                                                                                     |
|                                                           |                                                                                                                                                                                |                                                                                              |                                                                                     |
| <b>Time frame: past 36 months</b>                         |                                                                                                                                                                                |                                                                                              |                                                                                     |
| 2                                                         | Grants or contracts from any entity (if not indicated in item #1 above).                                                                                                       | ___ None                                                                                     |                                                                                     |
|                                                           |                                                                                                                                                                                |                                                                                              |                                                                                     |
|                                                           |                                                                                                                                                                                |                                                                                              |                                                                                     |
| 3                                                         | Royalties or licenses                                                                                                                                                          | ___ None                                                                                     |                                                                                     |
|                                                           |                                                                                                                                                                                |                                                                                              |                                                                                     |
|                                                           |                                                                                                                                                                                |                                                                                              |                                                                                     |
| 4                                                         | Consulting fees                                                                                                                                                                |                                                                                              |                                                                                     |
|                                                           |                                                                                                                                                                                |                                                                                              |                                                                                     |

|    |                                                                                                              |                 |                                 |
|----|--------------------------------------------------------------------------------------------------------------|-----------------|---------------------------------|
|    |                                                                                                              |                 |                                 |
| 5  | Payment or honoraria for lectures, presentations, speakers bureaus, manuscript writing or educational events | Astra Zeneca    | Publishing together             |
|    |                                                                                                              |                 |                                 |
|    |                                                                                                              |                 |                                 |
| 6  | Payment for expert testimony                                                                                 | ____ None       |                                 |
|    |                                                                                                              |                 |                                 |
|    |                                                                                                              |                 |                                 |
| 7  | Support for attending meetings and/or travel                                                                 | ____ None       |                                 |
|    |                                                                                                              |                 |                                 |
|    |                                                                                                              |                 |                                 |
| 8  | Patents planned, issued or pending                                                                           | ____ None       |                                 |
|    |                                                                                                              |                 |                                 |
|    |                                                                                                              |                 |                                 |
| 9  | Participation on a Data Safety Monitoring Board or Advisory Board                                            | AMRA Medical AB | Medical Advisor – Me personally |
|    |                                                                                                              |                 |                                 |
|    |                                                                                                              |                 |                                 |
| 10 | Leadership or fiduciary role in other board, society, committee or advocacy group, paid or unpaid            | ____ None       |                                 |
|    |                                                                                                              |                 |                                 |
|    |                                                                                                              |                 |                                 |
| 11 | Stock or stock options                                                                                       | ____ None       |                                 |
|    |                                                                                                              |                 |                                 |
|    |                                                                                                              |                 |                                 |
| 12 | Receipt of equipment, materials, drugs, medical writing, gifts or other services                             | ____ None       |                                 |
|    |                                                                                                              |                 |                                 |
|    |                                                                                                              |                 |                                 |
| 13 | Other financial or non-financial interests                                                                   | ____ None       |                                 |
|    |                                                                                                              |                 |                                 |
|    |                                                                                                              |                 |                                 |

Please place an “X” next to the following statement to indicate your agreement:

X  I certify that I have answered every question and have not altered the wording of any of the questions on this form.

## ICMJE DISCLOSURE FORM

Date: 2022-12-19

Your Name: Patrik Nasr

Manuscript Title: JHEPR-D-22-00573

Manuscript number (if known): Adverse muscle composition is a significant risk factor for all-cause mortality in NAFLD

In the interest of transparency, we ask you to disclose all relationships/activities/interests listed below that are related to the content of your manuscript. "Related" means any relation with for-profit or not-for-profit third parties whose interests may be affected by the content of the manuscript. Disclosure represents a commitment to transparency and does not necessarily indicate a bias. If you are in doubt about whether to list a relationship/activity/interest, it is preferable that you do so.

The following questions apply to the author's relationships/activities/interests as they relate to the current manuscript only.

The author's relationships/activities/interests should be defined broadly. For example, if your manuscript pertains to the epidemiology of hypertension, you should declare all relationships with manufacturers of antihypertensive medication, even if that medication is not mentioned in the manuscript.

In item #1 below, report all support for the work reported in this manuscript without time limit. For all other items, the time frame for disclosure is the past 36 months.

|                                                           |                                                                                                                                                                                | Name all entities with whom you have this relationship or indicate none (add rows as needed) | Specifications/Comments (e.g., if payments were made to you or to your institution) |
|-----------------------------------------------------------|--------------------------------------------------------------------------------------------------------------------------------------------------------------------------------|----------------------------------------------------------------------------------------------|-------------------------------------------------------------------------------------|
| <b>Time frame: Since the initial planning of the work</b> |                                                                                                                                                                                |                                                                                              |                                                                                     |
| 1                                                         | All support for the present manuscript (e.g., funding, provision of study materials, medical writing, article processing charges, etc.)<br><b>No time limit for this item.</b> | <u>  X  </u> None                                                                            |                                                                                     |
|                                                           |                                                                                                                                                                                |                                                                                              |                                                                                     |
|                                                           |                                                                                                                                                                                |                                                                                              |                                                                                     |
|                                                           |                                                                                                                                                                                |                                                                                              |                                                                                     |
|                                                           |                                                                                                                                                                                |                                                                                              |                                                                                     |
|                                                           |                                                                                                                                                                                |                                                                                              |                                                                                     |
|                                                           |                                                                                                                                                                                |                                                                                              |                                                                                     |
| <b>Time frame: past 36 months</b>                         |                                                                                                                                                                                |                                                                                              |                                                                                     |
| 2                                                         | Grants or contracts from any entity (if not indicated in item #1 above).                                                                                                       | ALF-Grants, Region Östergötland                                                              | Funding related to this and other projects                                          |
|                                                           |                                                                                                                                                                                | Lions Research Grant, Faculty of Medicine, Linköping University                              | Funding related to other projects                                                   |
|                                                           |                                                                                                                                                                                | Bengt Ihre Research Grant, Swedish Society of Gastroenterology                               | Funding related to other projects                                                   |

|    |                                                                                                              |                                                    |                                   |
|----|--------------------------------------------------------------------------------------------------------------|----------------------------------------------------|-----------------------------------|
|    |                                                                                                              | Magtarmfonden, Swedish Society of Gastroenterology | Funding related to other projects |
|    |                                                                                                              | Research Grant, Swedish Society of Medicine        | Funding related to other projects |
|    |                                                                                                              |                                                    |                                   |
|    |                                                                                                              |                                                    |                                   |
| 3  | Royalties or licenses                                                                                        | <input checked="" type="checkbox"/> None           |                                   |
|    |                                                                                                              |                                                    |                                   |
|    |                                                                                                              |                                                    |                                   |
| 4  | Consulting fees                                                                                              | <input checked="" type="checkbox"/> None           |                                   |
|    |                                                                                                              |                                                    |                                   |
|    |                                                                                                              |                                                    |                                   |
| 5  | Payment or honoraria for lectures, presentations, speakers bureaus, manuscript writing or educational events | <input checked="" type="checkbox"/> None           |                                   |
|    |                                                                                                              |                                                    |                                   |
|    |                                                                                                              |                                                    |                                   |
| 6  | Payment for expert testimony                                                                                 | <input checked="" type="checkbox"/> None           |                                   |
|    |                                                                                                              |                                                    |                                   |
|    |                                                                                                              |                                                    |                                   |
| 7  | Support for attending meetings and/or travel                                                                 | <input checked="" type="checkbox"/> None           |                                   |
|    |                                                                                                              |                                                    |                                   |
|    |                                                                                                              |                                                    |                                   |
| 8  | Patents planned, issued or pending                                                                           | <input checked="" type="checkbox"/> None           |                                   |
|    |                                                                                                              |                                                    |                                   |
|    |                                                                                                              |                                                    |                                   |
| 9  | Participation on a Data Safety Monitoring Board or Advisory Board                                            | <input checked="" type="checkbox"/> None           |                                   |
|    |                                                                                                              |                                                    |                                   |
|    |                                                                                                              |                                                    |                                   |
| 10 | Leadership or fiduciary role in other board, society, committee or advocacy group, paid or unpaid            | <input checked="" type="checkbox"/> None           |                                   |
|    |                                                                                                              |                                                    |                                   |
|    |                                                                                                              |                                                    |                                   |
| 11 | Stock or stock options                                                                                       | <input checked="" type="checkbox"/> None           |                                   |
|    |                                                                                                              |                                                    |                                   |
|    |                                                                                                              |                                                    |                                   |
| 12 | Receipt of equipment, materials, drugs, medical writing, gifts or other services                             | <input checked="" type="checkbox"/> None           |                                   |
|    |                                                                                                              |                                                    |                                   |
|    |                                                                                                              |                                                    |                                   |
| 13 | Other financial or non-financial interests                                                                   | <input checked="" type="checkbox"/> None           |                                   |
|    |                                                                                                              |                                                    |                                   |
|    |                                                                                                              |                                                    |                                   |

Please place an "X" next to the following statement to indicate your agreement:

I certify that I have answered every question and have not altered the wording of any of the questions on this form.

## ICMJE DISCLOSURE FORM

Date: 2022-12-19

Your Name: Jennifer Linge

Manuscript Title: JHEPR-D-22-00573

Manuscript number (if known): Adverse muscle composition is a significant risk factor for all-cause mortality in NAFLD

In the interest of transparency, we ask you to disclose all relationships/activities/interests listed below that are related to the content of your manuscript. "Related" means any relation with for-profit or not-for-profit third parties whose interests may be affected by the content of the manuscript. Disclosure represents a commitment to transparency and does not necessarily indicate a bias. If you are in doubt about whether to list a relationship/activity/interest, it is preferable that you do so.

The following questions apply to the author's relationships/activities/interests as they relate to the current manuscript only.

The author's relationships/activities/interests should be defined broadly. For example, if your manuscript pertains to the epidemiology of hypertension, you should declare all relationships with manufacturers of antihypertensive medication, even if that medication is not mentioned in the manuscript.

In item #1 below, report all support for the work reported in this manuscript without time limit. For all other items, the time frame for disclosure is the past 36 months.

|                                                           |                                                                                                                                                                                | Name all entities with whom you have this relationship or indicate none (add rows as needed) | Specifications/Comments (e.g., if payments were made to you or to your institution) |
|-----------------------------------------------------------|--------------------------------------------------------------------------------------------------------------------------------------------------------------------------------|----------------------------------------------------------------------------------------------|-------------------------------------------------------------------------------------|
| <b>Time frame: Since the initial planning of the work</b> |                                                                                                                                                                                |                                                                                              |                                                                                     |
| 1                                                         | All support for the present manuscript (e.g., funding, provision of study materials, medical writing, article processing charges, etc.)<br><b>No time limit for this item.</b> | ___ None                                                                                     |                                                                                     |
|                                                           |                                                                                                                                                                                |                                                                                              |                                                                                     |
|                                                           |                                                                                                                                                                                |                                                                                              |                                                                                     |
|                                                           |                                                                                                                                                                                |                                                                                              |                                                                                     |
|                                                           |                                                                                                                                                                                |                                                                                              |                                                                                     |
|                                                           |                                                                                                                                                                                |                                                                                              |                                                                                     |
| <b>Time frame: past 36 months</b>                         |                                                                                                                                                                                |                                                                                              |                                                                                     |
| 2                                                         | Grants or contracts from any entity (if not indicated in item #1 above).                                                                                                       | ___ None                                                                                     |                                                                                     |
|                                                           |                                                                                                                                                                                |                                                                                              |                                                                                     |
| 3                                                         | Royalties or licenses                                                                                                                                                          | ___ None                                                                                     |                                                                                     |
|                                                           |                                                                                                                                                                                |                                                                                              |                                                                                     |
| 4                                                         | Consulting fees                                                                                                                                                                | Eli Lilly                                                                                    | To institution                                                                      |
|                                                           |                                                                                                                                                                                |                                                                                              |                                                                                     |
|                                                           |                                                                                                                                                                                |                                                                                              |                                                                                     |



|    |                                                                                                              |                 |                                                   |
|----|--------------------------------------------------------------------------------------------------------------|-----------------|---------------------------------------------------|
| 5  | Payment or honoraria for lectures, presentations, speakers bureaus, manuscript writing or educational events | BioMarin        | To institution                                    |
|    |                                                                                                              |                 |                                                   |
|    |                                                                                                              |                 |                                                   |
| 6  | Payment for expert testimony                                                                                 | ___ None        |                                                   |
|    |                                                                                                              |                 |                                                   |
|    |                                                                                                              |                 |                                                   |
| 7  | Support for attending meetings and/or travel                                                                 | Eli Lilly       | To self                                           |
|    |                                                                                                              |                 |                                                   |
|    |                                                                                                              |                 |                                                   |
| 8  | Patents planned, issued or pending                                                                           | Patent pending  | "METHOD OF EVALUATING A MUSCLE RELATED CONDITION" |
|    |                                                                                                              |                 |                                                   |
|    |                                                                                                              |                 |                                                   |
| 9  | Participation on a Data Safety Monitoring Board or Advisory Board                                            | ___ None        |                                                   |
|    |                                                                                                              |                 |                                                   |
|    |                                                                                                              |                 |                                                   |
| 10 | Leadership or fiduciary role in other board, society, committee or advocacy group, paid or unpaid            | ___ None        |                                                   |
|    |                                                                                                              |                 |                                                   |
|    |                                                                                                              |                 |                                                   |
| 11 | Stock or stock options                                                                                       | ___ None        |                                                   |
|    |                                                                                                              |                 |                                                   |
|    |                                                                                                              |                 |                                                   |
| 12 | Receipt of equipment, materials, drugs, medical writing, gifts or other services                             | ___ None        |                                                   |
|    |                                                                                                              |                 |                                                   |
|    |                                                                                                              |                 |                                                   |
| 13 | Other financial or non-financial interests                                                                   | AMRA Medical AB | Employee                                          |
|    |                                                                                                              |                 |                                                   |
|    |                                                                                                              |                 |                                                   |

Please place an "X" next to the following statement to indicate your agreement:

I certify that I have answered every question and have not altered the wording of any of the questions on this form.

## ICMJE DISCLOSURE FORM

Date: 2022-12-19

Your Name: Olof Dahlqvist Leinhard

Manuscript Title: JHEPR-D-22-00573

Manuscript number (if known): Adverse muscle composition is a significant risk factor for all-cause mortality in NAFLD

In the interest of transparency, we ask you to disclose all relationships/activities/interests listed below that are related to the content of your manuscript. "Related" means any relation with for-profit or not-for-profit third parties whose interests may be affected by the content of the manuscript. Disclosure represents a commitment to transparency and does not necessarily indicate a bias. If you are in doubt about whether to list a relationship/activity/interest, it is preferable that you do so.

The following questions apply to the author's relationships/activities/interests as they relate to the current manuscript only.

The author's relationships/activities/interests should be defined broadly. For example, if your manuscript pertains to the epidemiology of hypertension, you should declare all relationships with manufacturers of antihypertensive medication, even if that medication is not mentioned in the manuscript.

In item #1 below, report all support for the work reported in this manuscript without time limit. For all other items, the time frame for disclosure is the past 36 months.

|                                                           |                                                                                                                                                                                | Name all entities with whom you have this relationship or indicate none (add rows as needed) | Specifications/Comments (e.g., if payments were made to you or to your institution) |
|-----------------------------------------------------------|--------------------------------------------------------------------------------------------------------------------------------------------------------------------------------|----------------------------------------------------------------------------------------------|-------------------------------------------------------------------------------------|
| <b>Time frame: Since the initial planning of the work</b> |                                                                                                                                                                                |                                                                                              |                                                                                     |
| 1                                                         | All support for the present manuscript (e.g., funding, provision of study materials, medical writing, article processing charges, etc.)<br><b>No time limit for this item.</b> | ___ None                                                                                     |                                                                                     |
|                                                           |                                                                                                                                                                                |                                                                                              |                                                                                     |
|                                                           |                                                                                                                                                                                |                                                                                              |                                                                                     |
|                                                           |                                                                                                                                                                                |                                                                                              |                                                                                     |
|                                                           |                                                                                                                                                                                |                                                                                              |                                                                                     |
|                                                           |                                                                                                                                                                                |                                                                                              |                                                                                     |
| <b>Time frame: past 36 months</b>                         |                                                                                                                                                                                |                                                                                              |                                                                                     |
| 2                                                         | Grants or contracts from any entity (if not indicated in item #1 above).                                                                                                       | ___ None                                                                                     |                                                                                     |
|                                                           |                                                                                                                                                                                |                                                                                              |                                                                                     |
| 3                                                         | Royalties or licenses                                                                                                                                                          | ___ None                                                                                     |                                                                                     |
|                                                           |                                                                                                                                                                                |                                                                                              |                                                                                     |
| 4                                                         | Consulting fees                                                                                                                                                                | Eli Lilly                                                                                    | To institution                                                                      |
|                                                           |                                                                                                                                                                                |                                                                                              |                                                                                     |
|                                                           |                                                                                                                                                                                |                                                                                              |                                                                                     |

|    |                                                                                                              |                 |                                                   |
|----|--------------------------------------------------------------------------------------------------------------|-----------------|---------------------------------------------------|
| 5  | Payment or honoraria for lectures, presentations, speakers bureaus, manuscript writing or educational events |                 |                                                   |
| 6  | Payment for expert testimony                                                                                 | ___ None        |                                                   |
| 7  | Support for attending meetings and/or travel                                                                 |                 |                                                   |
| 8  | Patents planned, issued or pending                                                                           | Patent pending  | "METHOD OF EVALUATING A MUSCLE RELATED CONDITION" |
| 9  | Participation on a Data Safety Monitoring Board or Advisory Board                                            | ___ None        |                                                   |
| 10 | Leadership or fiduciary role in other board, society, committee or advocacy group, paid or unpaid            | ___ None        |                                                   |
| 11 | Stock or stock options                                                                                       | AMRA Medical AB |                                                   |
| 12 | Receipt of equipment, materials, drugs, medical writing, gifts or other services                             | ___ None        |                                                   |
| 13 | Other financial or non-financial interests                                                                   | AMRA Medical AB | Employee                                          |

Please place an "X" next to the following statement to indicate your agreement:

\_\_\_ I certify that I have answered every question and have not altered the wording of any of the questions on this form.
